# Supplementary material
Source: MDPI journal article supplement (https://www.mdpi.com/2571-5135/6/3/11)
Supplement: s1 [file s1]

1 Review

# 2 Oral and Systemic Health: A Microbial and Genomic Perspective

3 Elisheva Friedman <sup>1</sup>, Negin Alizadeh <sup>2</sup> and Zvi Loewy <sup>3,4\*</sup>

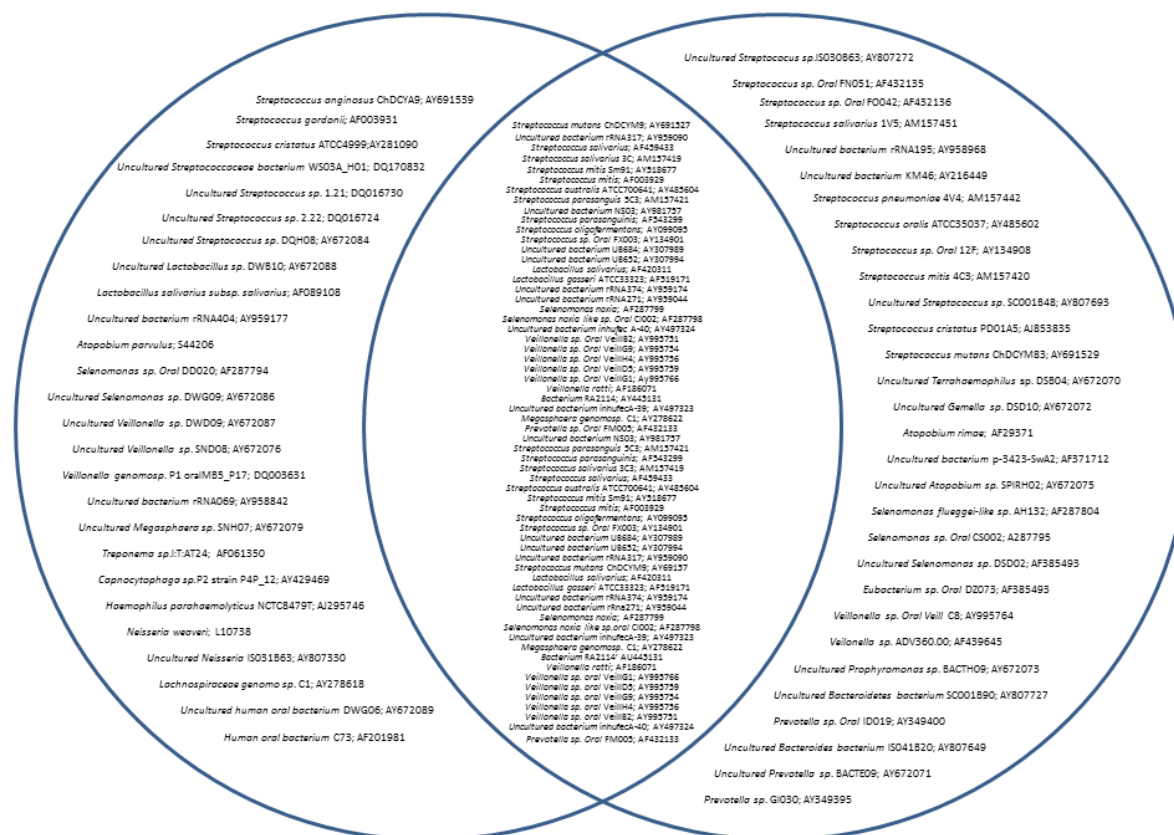

4

Figure S1: Microbial flora present in dentate and edentulous populations.
